# Supplementary material
Source: bioRxiv or medRxiv preprint supplement (https://www.biorxiv.org/highwire/filestream/101088/field_highwire_adjunct_files/2/324509-11.pdf)
Supplement: Supplementary file [file 324509-11.pdf]

**Supplementary Table 3. Laboratory values and 3BNC117 concentrations**

| <b>601</b>   | CD4+ T cells | CD4+ T cells | VL      | 3BNC117 |
|--------------|--------------|--------------|---------|---------|
| Timepoint    | cells/μl     | %            | cp/ml   | μg/ml   |
| Screen       | 950          | 25           | <20     |         |
| Pre          |              |              | <20     |         |
| Day 0 Base   | 655          | 25           | <20     | 0.00    |
| Day 0 End    |              |              |         | 812.35  |
| Week 1       |              |              |         | 112.20  |
| Week 4       | 851          | 27           | <20D    | 26.89   |
| Week 12 Base | 729          | 32           | <20     | 2.83    |
| Week 12 End  |              |              |         | 842.69  |
| Week 13      |              |              |         | 176.69  |
| Week 16      | 837          | 28           | <20     | 38.28   |
| Week 23      |              |              | <20     |         |
| Week 24 Base | 744          | 29           | <20     | 3.21    |
| Week 24 End  |              |              |         | 874.44  |
| Week 25      |              |              | <20     | 107.38  |
| Week 26      | 710          | 26           | <20     |         |
| Week 27 Base |              |              | 40      | 39.54   |
| Week 27 End  |              |              |         | 690.89  |
| Week 28      | 707          | 27           | 380     | 109.03  |
| Week 29      |              |              | 112,160 |         |
| Week 30      | 786          | 26           | 15,920  |         |
| Week 31      |              |              | 8,740   | 72.73   |
| Week 32      | 705          | 27           | 4,340   |         |
| Week 33      |              |              | 5,430   |         |
| Week 34      | 673          | 27           | 1,700   |         |
| Week 35      |              |              | 2,060   |         |
| Week 36      | 695          | 28           | 730     | 11.97   |
| Week 48      | 632          | 24           | <20D    | <0.10   |
| Week 56      |              |              | <20     |         |
| Week 60      | 743          | 30           | <20     |         |

| <b>602</b>   | CD4+ T cells | CD4+ T cells | VL    | 3BNC117  |
|--------------|--------------|--------------|-------|----------|
| Timepoint    | cells/μl     | %            | cp/ml | μg/ml    |
| Screen       | 927          | 55           | <20   |          |
| Pre          |              |              | <20D  |          |
| Day 0 Base   | 921          | 54           | <20   | 0.00     |
| Day 0 End    |              |              |       | 1,082.55 |
| Week 1       |              |              |       | 185.00   |
| Week 4       | 840          | 49           | <20   | 30.06    |
| Week 12 Base | 891          | 56           | <20D  | 4.19     |
| Week 12 End  |              |              |       | 455.88   |
| Week 13      |              |              |       | 230.62   |
| Week 16      | 802          | 50           | <20D  | 58.49    |
| Week 23      |              |              | <20D  |          |
| Week 24 Base | 791          | 53           | <20D  | 3.18     |
| Week 24 End  |              |              |       | 1,267.88 |
| Week 25      |              |              | <20   | 111.44   |
| Week 26      | 836          | 42           | 50    |          |
| Week 27 Base |              |              | 810   | 48.16    |
| Week 27 End  |              |              |       | 971.01   |
| Week 28      | 645          | 43           | 3,980 | 103.80   |
| Week 29      |              |              | 80    |          |
| Week 30      | 714          | 42           | 20    |          |
| Week 31      |              |              | <20   | 49.04    |
| Week 32      | 789          | 46           | <20D  |          |
| Week 33      |              |              | <20D  |          |
| Week 34      | 926          | 44           | <20D  |          |
| Week 35      |              |              | <20   |          |
| Week 36      | 1,037        | 50           | <20   | 5.59     |
| Week 48      | 719          | 42           | <20D  | <0.10    |
| Week 56      |              |              | 30    |          |
| Week 60      | 905          | 50           | <20D  |          |

| <b>603</b>   | CD4+ T cells | CD4+ T cells | VL    | 3BNC117 |
|--------------|--------------|--------------|-------|---------|
| Timepoint    | cells/μl     | %            | cp/ml | μg/ml   |
| Screen       | 1,065        | 46           | <20   |         |
| Pre          |              |              | <20   |         |
| Day 0 Base   | 693          | 43           | <20   | 0.00    |
| Day 0 End    |              |              |       | 851.70  |
| Week 1       |              |              |       | 154.08  |
| Week 4       | 937          | 45           | <20   | 29.22   |
| Week 12 Base | 748          | 44           | <20   | 2.25    |
| Week 12 End  |              |              |       | 635.87  |
| Week 13      |              |              |       | 116.68  |
| Week 16      | 748          | 44           | <20   | 35.42   |
| Week 23      |              |              | <20   |         |
| Week 24 Base | 730          | 46           | <20   | 2.00    |
| Week 24 End  |              |              |       | 640.35  |
| Week 25      |              |              | <20   | 79.37   |
| Week 26      | 804          | 47           | <20   |         |
| Week 27 Base |              |              | <20   | 30.44   |
| Week 27 End  |              |              |       | 641.33  |
| Week 28      | 866          | 43           | <20D  | 74.02   |
| Week 29      |              |              | <20D  |         |
| Week 30      | 683          | 43           | 450   | 38.04   |
| Week 31      |              |              | 7,430 | 41.85   |
| Week 32      | 714          | 42           | 3,820 |         |
| Week 33      |              |              | 140   |         |
| Week 34      | 620          | 41           | 70    |         |
| Week 35      |              |              | 40    |         |
| Week 36      | 1,061        | 41           | 50    | 6.89    |
| Week 48      | 893          | 43           | <20   | <0.10   |
| Week 56      |              |              | <20   |         |
| Week 60      | 772          | 43           | <20D  |         |

| <b>604</b>   | CD4+ T cells | CD4+ T cells | VL    | 3BNC117 |
|--------------|--------------|--------------|-------|---------|
| Timepoint    | cells/μl     | %            | cp/ml | μg/ml   |
| Screen       | 597          | 40           | <20   |         |
| Pre          |              |              | <20   |         |
| Day 0 Base   | 560          | 40           | <20   | 0.00    |
| Day 0 End    |              |              |       | 1596.14 |
| Week 1       |              |              |       | 195.69  |
| Week 4       | 728          | 38           | <20   | 49.49   |
| Week 12 Base | 581          | 39           | <20   | 2.39    |
| Week 12 End  |              |              |       | 1361.36 |
| Week 13      |              |              |       | 125.94  |
| Week 16      | 616          | 44           | <20   | 26.10   |
| Week 23      |              |              | <20   |         |
| Week 24 Base | 536          | 41           | <20D  | 2.21    |
| Week 24 End  |              |              |       | 1024.17 |
| Week 25      |              |              | <20   | 124.33  |
| Week 26      | 561          | 37           | <20   |         |
| Week 27 Base |              |              | <20   | 47.95   |
| Week 27 End  |              |              |       | 1103.07 |
| Week 28      | 579          | 39           | <20   | 220.30  |
| Week 29      |              |              | <20D  |         |
| Week 30      | 678          | 40           | 200   | 45.58   |
| Week 31      |              |              | 2,620 | 69.97   |
| Week 32      | 664          | 42           | 5,130 |         |
| Week 33      |              |              | 50    |         |
| Week 34      | 693          | 39           | <20D  |         |
| Week 35      |              |              | <20D  |         |
| Week 36      | 720          | 40           | <20D  | 5.50    |
| Week 48      | 838          | 42           | <20   | <0.10   |
| Week 56      |              |              | <20   |         |
| Week 60      | 694          | 41           | <20   |         |

| <b>605</b>   | CD4+ T cells | CD4+ T cells | VL    | 3BNC117  |
|--------------|--------------|--------------|-------|----------|
| Timepoint    | cells/μl     | %            | cp/ml | μg/ml    |
| Screen       | 706          | 32           | <20   |          |
| Pre          |              |              | <20   |          |
| Day 0 Base   | 524          | 29           | 20    | 0.00     |
| Day 0 End    |              |              |       | 752.60   |
| Week 1       |              |              |       | 79.55    |
| Week 4       | 638          | 32           | <20   | 21.42    |
| Week 12 Base | 494          | 33           | <20   | 1.60     |
| Week 12 End  |              |              |       | 1,060.86 |
| Week 13      |              |              |       | 68.67    |
| Week 16      | 593          | 31           | <20D  | 13.75    |
| Week 23      |              |              | <20   |          |
| Week 24 Base | 496          | 31           | <20   | 1.60     |
| Week 24 End  |              |              |       | 697.49   |
| Week 25      |              |              | <20   | 72.10    |
| Week 26      | 561          | 30           | <20D  |          |
| Week 27 Base |              |              | 650   | 19.50    |
| Week 27 End  |              |              |       | 557.83   |
| Week 28      | 682          | 28           | 120   | 74.00    |
| Week 29      |              |              | 1,720 |          |
| Week 30      | 616          | 31           | <20D  | 43.04    |
| Week 31      |              |              | <20   | 22.85    |
| Week 32      | 561          | 30           | <20   |          |
| Week 33      |              |              | <20   |          |
| Week 34      | 662          | 30           | <20   |          |
| Week 35      |              |              | <20   |          |
| Week 36      | 584          | 29           | <20   |          |
| Week 48      | 612          | 34           | <20   | <0.10    |
| Week 56      |              |              | <20   |          |
| Week 60      | 573          | 34           | <20   |          |

| <b>608</b>   | CD4+ T cells | CD4+ T cells | VL     | 3BNC117  |
|--------------|--------------|--------------|--------|----------|
| Timepoint    | cells/μl     | %            | cp/ml  | μg/ml    |
| Screen       | 549          | 31           | <20D   |          |
| Pre          |              |              | <20D   |          |
| Day 0 Base   | 688          | 30           | <20    | 0.00     |
| Day 0 End    |              |              |        | 814.16   |
| Week 1       |              |              |        | 124.08   |
| Week 4       | 618          | 31           | 50     | 14.07    |
| Week 12 Base | 494          | 31           | <20D   | 1.46     |
| Week 12 End  |              |              |        | 915.74   |
| Week 13      |              |              |        | 63.75    |
| Week 16      | 525          | 31           | <20    | 13.92    |
| Week 23      |              |              | 60     |          |
| Week 24 Base | 510          | 30           | 60     | 1.29     |
| Week 24 End  |              |              |        | 1,072.76 |
| Week 25      |              |              | <20D   | 121.70   |
| Week 26      | 553          | 29           | 220    | 37.35    |
| Week 27 Base |              |              | 380    | 19.40    |
| Week 27 End  |              |              |        | 692.21   |
| Week 28      |              |              |        |          |
| Week 29      |              |              | 48,580 |          |
| Week 30      | 504          | 27           | 34,580 |          |
| Week 31      |              |              | 2,790  | 7.59     |
| Week 32      | 615          | 21           | 500    |          |
| Week 33      |              |              | 100    |          |
| Week 34      | 488          | 21           | 50     |          |
| Week 35      |              |              | 40     |          |
| Week 36      | 466          | 25           | 40     | 2.40     |
| Week 48      | 457          | 27           | 20     |          |
| Week 56      |              |              | 230    |          |
| Week 60      | 441          | 23           | <20D   |          |

| <b>609</b>   | CD4+ T cells | CD4+ T cells | VL     | 3BNC117  |
|--------------|--------------|--------------|--------|----------|
| Timepoint    | cells/μl     | %            | cp/ml  | μg/ml    |
| Screen       | 957          | 56           | <20    |          |
| Pre          |              |              | 30     |          |
| Day 0 Base   | 1,418        | 53           | 30     | 0.00     |
| Day 0 End    |              |              |        | 1,287.89 |
| Week 1       |              |              |        | 118.46   |
| Week 4       | 1,240        | 54           | <20    | 26.37    |
| Week 12 Base | 1,263        | 57           | <20    | 1.94     |
| Week 12 End  |              |              |        | 794.72   |
| Week 13      |              |              |        | 154.71   |
| Week 16      | 1,685        | 58           | <20    | 31.08    |
| Week 23      |              |              |        |          |
| Week 24 Base | 1,263        | 55           | <20    | 2.88     |
| Week 24 End  |              |              |        | 909.08   |
| Week 25      |              |              | <20D   | 191.52   |
| Week 26      | 1,425        | 55           | <20D   |          |
| Week 27 Base |              |              | <20    | 39.02    |
| Week 27 End  |              |              |        | 686.49   |
| Week 28      | 990          | 52           | 80     | 100.52   |
| Week 29      |              |              | 2,440  | 57.41    |
| Week 30      |              |              |        |          |
| Week 31      |              |              |        |          |
| Week 32      | 925          | 51           | 12,940 | 50.22    |
| Week 33      |              |              | 790    |          |
| Week 34      | 1,120        | 56           | 160    |          |
| Week 35      |              |              | 50     |          |
| Week 36      | 949          | 56           | 70     |          |
| Week 48      | 1,159        | 55           | <20D   | <0.10    |
| Week 56      |              |              | <20    |          |
| Week 60      | 870          | 51           | <20    |          |

| <b>610</b>   | CD4+ T cells | CD4+ T cells | VL     | 3BNC117 |       |
|--------------|--------------|--------------|--------|---------|-------|
| Timepoint    | cells/μl     | %            | cp/ml  | μg/ml   |       |
| Screen       | 556          | 40           | <20    |         |       |
| Pre          |              |              | <20    |         |       |
| Day 0 Base   | 486          | 44           | <20    | 0.00    |       |
| Day 0 End    |              |              |        | 665.55  |       |
| Week 1       |              |              |        | 69.65   |       |
| Week 4       | 653          | 44           | <20    | 23.78   |       |
| Week 12 Base | 803          | 50           | <20    | 4.20    |       |
| Week 12 End  |              |              |        | 991.08  |       |
| Week 13      |              |              |        |         |       |
| Week 16      | 564          | 40           | <20    | 44.72   |       |
| Week 23      |              |              | <20    |         |       |
| Week 24 Base | 768          | 51           | <20    | 3.03    |       |
| Week 24 End  |              |              |        | 666.53  |       |
| Week 25      |              |              | <20    | 102.90  |       |
| Week 26      | 538          | 41           | <20    |         |       |
| Week 27 Base |              |              | <20    | 62.78   |       |
| Week 27 End  |              |              |        | 639.71  |       |
| Week 28      | 610          | 46           | <20    | 124.01  |       |
| Week 29      |              |              | 50     |         |       |
| Week 30      | 497          | 50           | 310    | 81.68   |       |
| Week 31      |              |              | 20,010 | 94.29   |       |
| Week 32      |              |              |        |         |       |
| Week 33      |              |              | 130    |         |       |
| Week 34      | 618          | 48           | <20D   |         |       |
| Week 35      |              |              | <20D   |         |       |
| Week 36      |              |              | 50     | <20     | 10.64 |
| Week 48      | 584          | 35           | 20     | <0.10   |       |
| Week 56      |              |              |        |         |       |
| Week 60      | 722          | 40           | <20    |         |       |

Supplementary Table 3 continued.

| 611          | CD4+ T cells   | CD4+ T cells | VL    | 3BNC117    |
|--------------|----------------|--------------|-------|------------|
| Timepoint    | cells/ $\mu$ l | %            | cp/ml | $\mu$ g/ml |
| Screen       | 511            | 33           | <20   |            |
| Pre          |                |              | <20   |            |
| Day 0 Base   | 391            | 36           | <20   | 0.00       |
| Day 0 End    |                |              |       | 804.58     |
| Week 1       |                |              |       | 50.76      |
| Week 4       | 595            | 31           | <20D  | 15.03      |
| Week 12 Base | 338            | 38           | <20   | 2.57       |
| Week 12 End  |                |              |       | 425.94     |
| Week 13      |                |              |       | 56.42      |
| Week 16      | 493            | 35           | 70    | 23.06      |
| Week 23      | 379            | 38           | <20   |            |
| Week 24 Base |                |              | <20   | 2.74       |
| Week 24 End  |                |              |       | 488.06     |
| Week 25      |                |              | <20   |            |
| Week 26      | 418            | 35           | <20   |            |
| Week 27 Base |                |              | <20D  | 29.05      |
| Week 27 End  |                |              |       | 856.46     |
| Week 28      | 321            | 36           | 30    | 91.02      |
| Week 29      |                |              | <20D  |            |
| Week 30      | 336            | 34           | 390   | 71.17      |
| Week 31      |                |              | 2,580 | 50.22      |
| Week 32      | 416            | 33           | 60    |            |
| Week 33      |                |              | 20    |            |
| Week 34      |                | 35           | 20    |            |
| Week 35      |                |              | 20    |            |
| Week 36      | 392            | 36           | 30    | 13.11      |
| Week 37      |                |              |       |            |
| Week 38      |                |              |       |            |
| Week 48      | 349            | 35           | <20   | 0.18       |
| Week 56      |                |              | <20   |            |
| Week 60      | 390            | 30           | <20   |            |

| 613          | CD4+ T cells   | CD4+ T cells | VL    | 3BNC117    |
|--------------|----------------|--------------|-------|------------|
| Timepoint    | cells/ $\mu$ l | %            | cp/ml | $\mu$ g/ml |
| Screen       | 653            | 30           | <20   |            |
| Pre          |                |              | <20   |            |
| Day 0 Base   | 576            | 30           | <20   | 0.00       |
| Day 0 End    |                |              |       | 456.73     |
| Week 1       |                |              |       | 102.70     |
| Week 4       | 374            | 31           | <20   | 12.60      |
| Week 12 Base | 554            | 31           | <20D  | 1.60       |
| Week 12 End  |                |              |       | 486.83     |
| Week 13      |                |              |       | 42.38      |
| Week 16      | 519            | 30           | <20   | 18.12      |
| Week 23      |                |              | <20   |            |
| Week 24 Base | 500            | 33           | <20   | 1.17       |
| Week 24 End  |                |              |       | 582.71     |
| Week 25      |                |              | <20   | 64.06      |
| Week 26      | 490            | 29           | 80    |            |
| Week 27 Base |                |              | <20   | 20.25      |
| Week 27 End  |                |              |       | 508.23     |
| Week 28      | 452            | 32           | <20   | 127.14     |
| Week 29      |                |              | <20   |            |
| Week 30      | 414            | 30           | <20   |            |
| Week 31      |                |              | <20   | 31.68      |
| Week 32      | 398            | 28           | 20    |            |
| Week 33      |                |              | 40    |            |
| Week 34      | 335            | 28           | <20D  |            |
| Week 35      |                |              | 80    |            |
| Week 36      | 609            | 29           | 250   | 2.94       |
| Week 37      |                |              | 1,170 | 2.62       |
| Week 38      |                |              | 2,570 |            |
| Week 48      | 594            | 27           | <20   |            |
| Week 56      |                |              | <20   |            |
| Week 60      | 540            | 28           |       |            |

| 614          | CD4+ T cells   | CD4+ T cells | VL     | 3BNC117    |
|--------------|----------------|--------------|--------|------------|
| Timepoint    | cells/ $\mu$ l | %            | cp/ml  | $\mu$ g/ml |
| Screen       | 661            | 39           | <20    |            |
| Pre          |                |              | <20    |            |
| Day 0 Base   | 487            | 35           | <20    | 0.00       |
| Day 0 End    |                |              |        | 682.93     |
| Week 1       |                |              |        | 58.07      |
| Week 4       | 400            | 36           | <20    | 10.72      |
| Week 12 Base | 415            | 35           | <20    | 1.60       |
| Week 12 End  |                |              |        | 342.35     |
| Week 13      |                |              |        | 33.06      |
| Week 16      | 530            | 35           | <20    | 7.55       |
| Week 23      |                |              | <20D   |            |
| Week 24 Base | 373            | 34           | <20    | 1.60       |
| Week 24 End  |                |              |        | 359.50     |
| Week 25      |                |              | <20    | 45.32      |
| Week 26      | 354            | 39           | <20    |            |
| Week 27 Base |                |              | <20D   | 16.11      |
| Week 27 End  |                |              |        | 390.63     |
| Week 28      | 432            | 36           | 1,280  | 57.24      |
| Week 29      |                |              | 36,950 |            |
| Week 30      | 424            | 35           | 850    |            |
| Week 31      |                |              | 40     | 10.03      |
| Week 32      | 508            | 36           | <20D   |            |
| Week 33      |                |              | <20    |            |
| Week 34      | 370            | 37           | <20    |            |
| Week 35      |                |              | <20    |            |
| Week 36      | 465            | 36           | <20    | 3.16       |
| Week 37      |                |              |        |            |
| Week 38      |                |              |        |            |
| Week 48      | 495            | 38           | <20    |            |
| Week 56      |                |              | <20    |            |
| Week 60      | 646            | 38           | <20    |            |

| 615          | CD4+ T cells   | CD4+ T cells | VL     | 3BNC117    |
|--------------|----------------|--------------|--------|------------|
| Timepoint    | cells/ $\mu$ l | %            | cp/ml  | $\mu$ g/ml |
| Screen       | 1,184          | 42           | <20D   |            |
| Pre          |                |              | <20    |            |
| Day 0 Base   | 991            | 41           | <20    | 0.00       |
| Day 0 End    |                |              |        | 595.89     |
| Week 1       |                |              |        | 48.02      |
| Week 4       | 983            | 38           | <20D   | 13.06      |
| Week 12 Base | 1,165          | 42           | <20D   | 1.60       |
| Week 12 End  |                |              |        | 477.02     |
| Week 13      |                |              |        | 52.08      |
| Week 16      | 1,043          | 42           | <20D   | 8.78       |
| Week 23      |                |              | 60     |            |
| Week 24 Base | 929            | 40           | 20     | 1.60       |
| Week 24 End  |                |              |        | 573.06     |
| Week 25      |                |              | <20D   | 43.64      |
| Week 26      | 994            | 43           | <20D   |            |
| Week 27 Base |                |              | 170    | 28.86      |
| Week 27 End  |                |              |        | 584.08     |
| Week 28      | 880            | 40           | 3,890  | 69.42      |
| Week 29      |                |              | 22,890 |            |
| Week 30      | 1,137          | 39           | 1,380  |            |
| Week 31      |                |              | 210    | 24.03      |
| Week 32      | 993            | 40           | 70     |            |
| Week 33      |                |              | 80     |            |
| Week 34      | 1,013          | 41           | 30     |            |
| Week 35      |                |              | 50     |            |
| Week 36      | 890            | 38           | <20D   | 8.03       |
| Week 37      |                |              |        |            |
| Week 38      |                |              |        |            |
| Week 48      | 1,262          | 41           | <20    |            |
| Week 56      |                |              | <20    |            |
| Week 60      | 1,226          | 44           | <20D   |            |

| 616          | CD4+ T cells   | CD4+ T cells | VL    | 3BNC117    |
|--------------|----------------|--------------|-------|------------|
| Timepoint    | cells/ $\mu$ l | %            | cp/ml | $\mu$ g/ml |
| Screen       | 576            | 44           | <20   |            |
| Pre          |                |              | <20   |            |
| Day 0 Base   | 896            | 45           | <20   | 0.00       |
| Day 0 End    |                |              |       | 935.68     |
| Week 1       |                |              |       | 82.45      |
| Week 4       | 1,110          | 44           | <20D  | 19.02      |
| Week 12 Base | 736            | 46           | <20   | 1.60       |
| Week 12 End  |                |              |       | 878.98     |
| Week 13      |                |              |       | 86.81      |
| Week 16      | 916            | 46           | 20    | 12.47      |
| Week 23      |                |              | <20   |            |
| Week 24 Base | 790            | 44           | <20   | 1.60       |
| Week 24 End  |                |              |       | 856.58     |
| Week 25      |                |              | <20   | 70.22      |
| Week 26      | 818            | 50           | <20   |            |
| Week 27 Base |                |              | <20   | 52.52      |
| Week 27 End  |                |              |       | 895.14     |
| Week 28      | 651            | 38           | <20   | 105.22     |
| Week 29      |                |              | <20   |            |
| Week 30      | 789            | 34           | <20   |            |
| Week 31      |                |              | <20   | 53.53      |
| Week 32      | 594            | 40           | <20   |            |
| Week 33      |                |              | <20   |            |
| Week 34      | 501            | 33           | <20   |            |
| Week 35      |                |              | <20   |            |
| Week 36      | 610            | 36           | <20   | 5.86       |
| Week 40      |                |              | 50    | 1.67       |
| Week 41      |                |              | 100   |            |
| Week 42      |                |              | <20   |            |
| Week 48      | 851            | 41           | <20D  |            |
| Week 56      |                |              | <20   |            |
| Week 60      | 682            | 40           | <20D  |            |

| 618          | CD4+ T cells   | CD4+ T cells | VL    | 3BNC117    |
|--------------|----------------|--------------|-------|------------|
| Timepoint    | cells/ $\mu$ l | %            | cp/ml | $\mu$ g/ml |
| Screen       | 920            | 40           | <20   |            |
| Pre          |                |              | <20   |            |
| Day 0 Base   | 874            | 44           | <20D  | 0.00       |
| Day 0 End    |                |              |       | 702.56     |
| Week 1       |                |              |       | 74.40      |
| Week 4       | 662            | 41           | <20   | 14.42      |
| Week 12 Base | 959            | 42           | <20   | 1.60       |
| Week 12 End  |                |              |       | 483.81     |
| Week 13      |                |              |       | 68.26      |
| Week 16      | 838            | 42           | <20   | 13.38      |
| Week 23      |                |              | <20   |            |
| Week 24 Base | 1,025          | 47           | <20   | 1.60       |
| Week 24 End  |                |              |       | 969.69     |
| Week 25      |                |              | <20   | 51.24      |
| Week 26      | 753            | 44           | 240   | 42.98      |
| Week 27 Base |                |              | 7,760 | 33.34      |
| Week 27 End  |                |              |       |            |
| Week 28      | 869            | 40           | <20D  | 14.19      |
| Week 29      |                |              | <20   |            |
| Week 30      | 654            | 41           | <20   |            |
| Week 31      |                |              | <20   | 7.11       |
| Week 32      | 667            | 42           | <20   |            |
| Week 33      |                |              | <20   |            |
| Week 34      | 739            | 39           | <20   |            |
| Week 35      |                |              | <20   |            |
| Week 36      | 709            | 42           | <20   | 0.84       |
| Week 40      |                |              | <20   |            |
| Week 41      |                |              |       |            |
| Week 42      |                |              |       |            |
| Week 48      | 864            | 43           | <20   |            |
| Week 56      |                |              | <20D  |            |
| Week 60      | 714            | 42           | <20   |            |

| 619          | CD4+ T cells   | CD4+ T cells | VL      | 3BNC117    |
|--------------|----------------|--------------|---------|------------|
| Timepoint    | cells/ $\mu$ l | %            | cp/ml   | $\mu$ g/ml |
| Screen       | 599            | 33           | <20     |            |
| Pre          |                |              | <20     |            |
| Day 0 Base   | 704            | 32           | <20     | 0.00       |
| Day 0 End    |                |              |         | 1,250.30   |
| Week 1       |                |              |         | 86.54      |
| Week 4       | 865            | 35           | <20     | 8.04       |
| Week 12 Base | 661            | 37           | <20     | 1.60       |
| Week 12 End  |                |              |         | 860.08     |
| Week 13      |                |              |         | 82.45      |
| Week 16      | 475            | 34           | <20     | 11.79      |
| Week 23      |                |              | <20     |            |
| Week 24 Base | 563            | 33           | <20     | 1.60       |
| Week 24 End  |                |              |         | 782.42     |
| Week 25      |                |              | <20     | 112.36     |
| Week 26      | 757            | 33           | <20     |            |
| Week 27 Base |                |              | 300     | 18.15      |
| Week 27 End  |                |              |         | 476.78     |
| Week 28      | 480            | 32           | 12,690  | 43.24      |
| Week 29      |                |              | 140,880 | 31.90      |
| Week 30      | 594            | 28           | 670     |            |
| Week 31      |                |              | 230     | 21.63      |
| Week 32      | 761            | 28           | 170     |            |
| Week 33      |                |              | 30      |            |
| Week 34      | 683            | 30           | 40      |            |
| Week 35      |                |              | <20D    |            |
| Week 36      | 594            | 28           | <20 D   | 0.49       |
| Week 40      |                |              | <20     |            |
| Week 41      |                |              |         |            |
| Week 42      |                |              |         |            |
| Week 48      | 660            | 30           | <20     |            |
| Week 56      |                |              | <20     |            |
| Week 60      | 993            | 33           | <20D    |            |
